# Supplementary material for: Improving cell mixture deconvolution by identifying optimal DNA methylation libraries (IDOL)
Source: PubMed Central journal article supplement (PMC4782368; doi:10.1186/s12859-016-0943-7), 2016-03-08

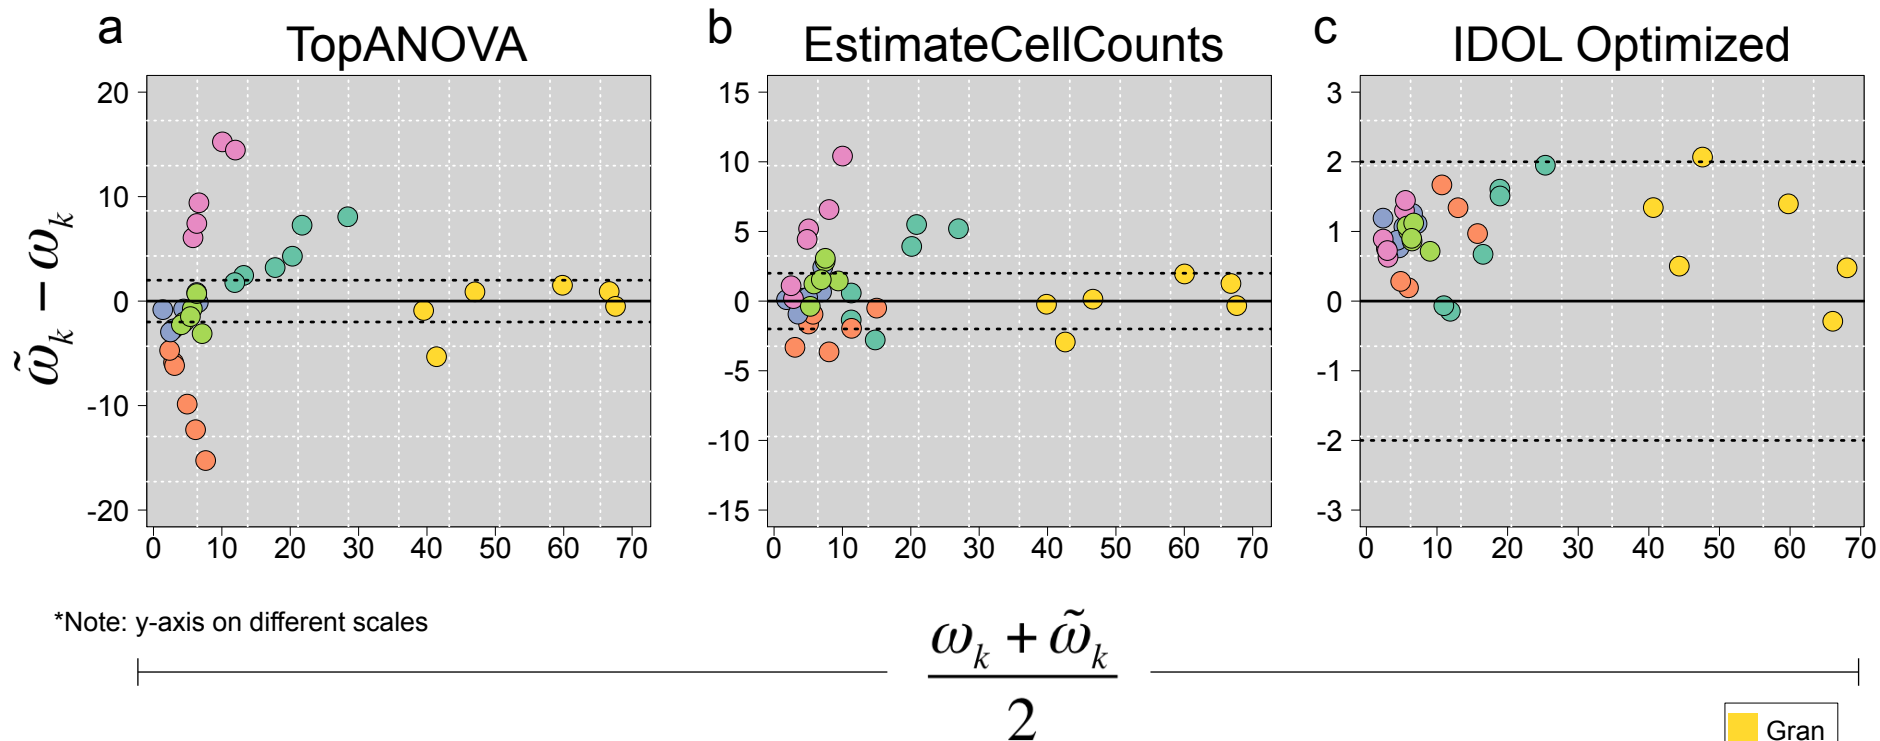

**Supplementary Figure 1:** Bland-Altman plots constructed from cell fraction estimates of the  $n = 6$  AdultMixed samples obtained using the TopANOVA (a), EstimateCellCounts (b), and IDOL Optimized (c) L-DMR libraries.

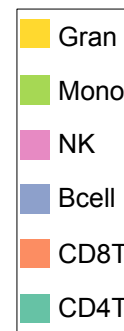

Supplement: 12859_2016_943_MOESM2_ESM.pdf [file 12859_2016_943_MOESM2_ESM.pdf]
