# Supplementary material for: Improving cell mixture deconvolution by identifying optimal DNA methylation libraries (IDOL)
Source: PubMed Central journal article supplement (PMC4782368; doi:10.1186/s12859-016-0943-7), 2016-03-08

**Supplementary Figure 5:** Cell type prediction performance ( $R^2$  Top and  $RMSE$  bottom) as a function each cell types mean observed mixture fraction in the MethodA reconstruction samples.

TopANOVA

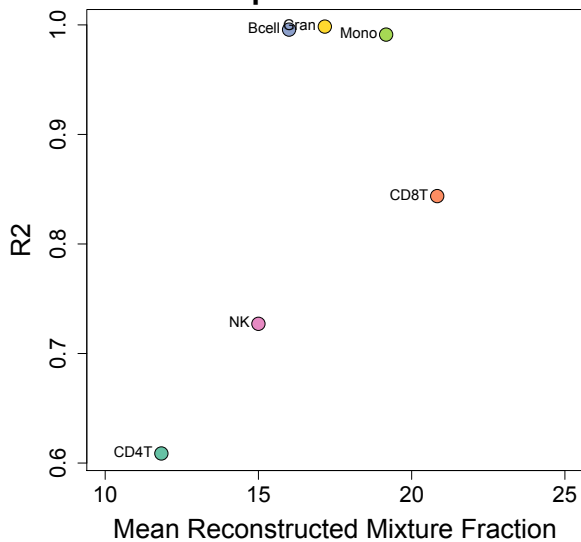

EstimateCellCounts

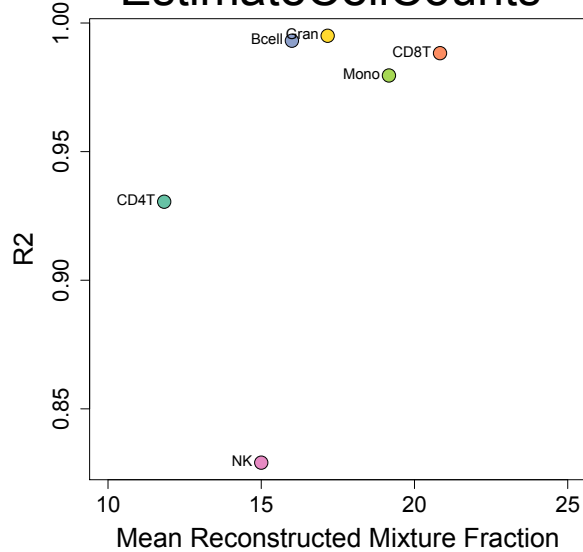

IDOL Optimized

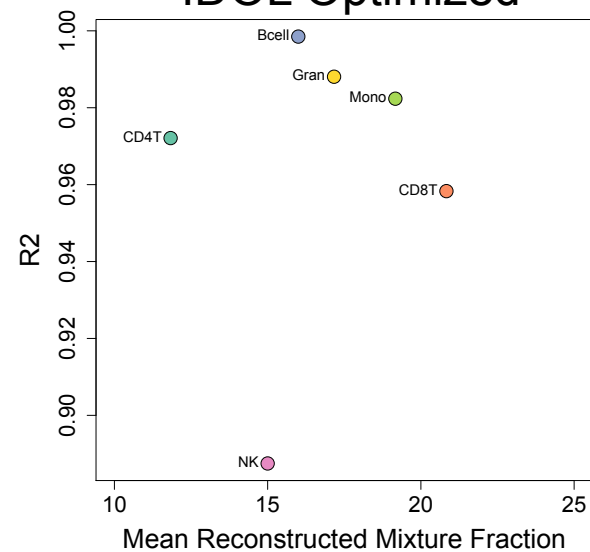

TopANOVA

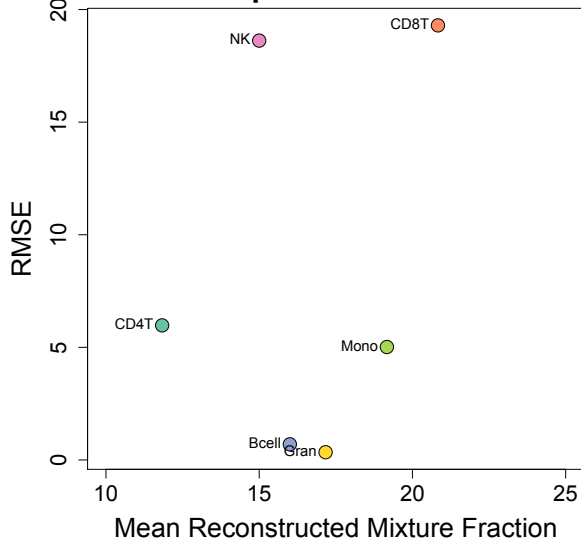

EstimateCellCounts

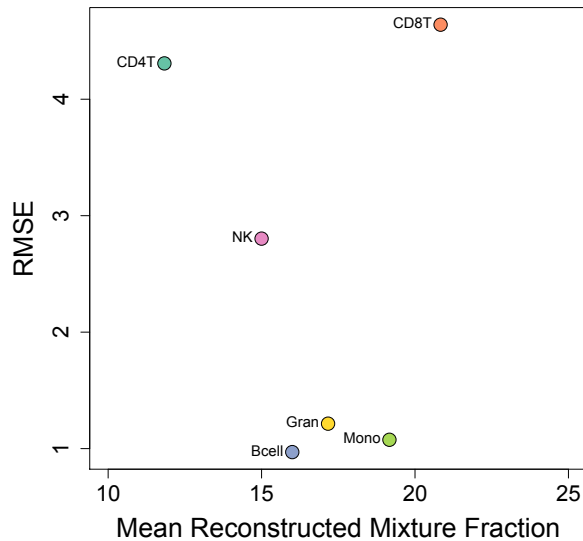

IDOL Optimized

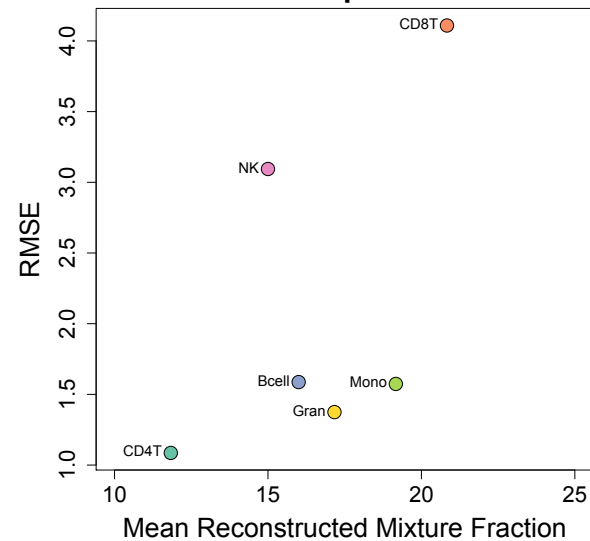

Supplement: 12859_2016_943_MOESM9_ESM.pdf [file 12859_2016_943_MOESM9_ESM.pdf]
